# Supplementary material for: A Novel Type of Blood Biomarker: Distinct Changes of Cytokine-Induced STAT Phosphorylation in Blood T Cells Between Colorectal Cancer Patients and Healthy Individuals
Source: MDPI journal article supplement (doi:10.3390/cancers11081157), 2019-08-12
Supplement: s1 [file s1]

**A**

| Features                              | MeanDecreaseGini |
|---------------------------------------|------------------|
| IL-6 induced P-STAT3 on CD8+ T        | 3.588            |
| IL-10 induced P-STAT3 on CD4+ T       | 3.539            |
| IL-10 induced P-STAT3 on CD8+ T       | 3.385            |
| IL-6 induced P-STAT1 on regulatory T  | 2.387            |
| IL-6 induced P-STAT1 on CD8+ T        | 2.032            |
| IL-10 induced P-STAT3 on regulatory T | 1.701            |
| IL-6 induced P-STAT1 on CD4+ T        | 1.554            |
| IL-6 induced P-STAT3 on CD4+ T        | 0.909            |
| IL-6 induced P-STAT3 on regulatory T  | 0.85             |

**B**

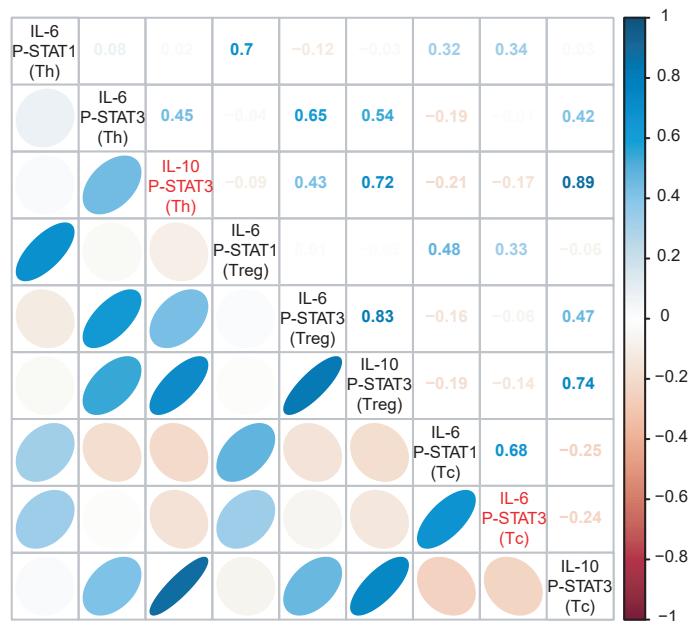

**Figure S1.** Feature selection and correlation of features. **A.** Feature selection based on MeanDecreaseGini. From the highest, two values were selected. **B.** The correlation plot for nine CIPS signatures. The two selected features (red), IL-6 induced P-STAT3 on CD8+ T (Tc) and IL-10 induced P-STAT3 on CD4+ T (Th), showed no correlation, indicating that the two features are independent to each other.
