# Supplementary material for: A Novel Type of Blood Biomarker: Distinct Changes of Cytokine-Induced STAT Phosphorylation in Blood T Cells Between Colorectal Cancer Patients and Healthy Individuals
Source: Cancers (Basel). 2019 Aug 12;11(8):1157. doi: 10.3390/cancers11081157 (PMC6721561; doi:10.3390/cancers11081157)
Supplement: Supplementary file 1 [file cancers-11-01157-s001.zip › cancers-524079-Supplementary Tables.xlsx]

## Sheet: TableS1
Table S1. Data of white blood cell subset in peripheral blood and tumor site of colorectal cancer patients; Total lymphoid and myeloid fraction was calculated without excluding debris.
	Peripheral blood												Tumor site
ID \ Subset	Total lymphoid cell	T cell (CD3+)	B cell (CD19+)	NK cell (CD3+,CD56+)	T cell (CD4+)	T cell (CD8+)	T cell (CD4+) / T cell (CD8+)	T cell (CD4-,CD8-)	T cell (CD4+,CD25+)	T cell (CD4+,CD25+,Foxp3+)	PB_CD8+CD25+	Total myeloid cell	Total lymphoid cell	T cell (CD3+)	B cell (CD19+)	NK cell (CD3+,CD56+)	T cell (CD4+)	T cell (CD8+)	T cell (CD4+) / T cell (CD8+)	T cell (CD4-,CD8-)	T cell (CD4+,CD25+)	T cell (CD4+,CD25+,Foxp3+)	PB_CD8+CD25+	Total myeloid cell
CRC_01	NA	NA	NA	NA	68.6	27.4	2.50365	2.8	15.5	7.2	0.2	NA	NA	NA	NA	NA	NA	NA	NA	NA	NA	NA	NA	NA
CRC_02	NA	NA	NA	NA	44.1	8.9	4.95506	NA	6.8	2.1	NA	NA	NA	NA	NA	NA	76.5	3.9	19.6154	NA	25.8	14.3	NA	NA
CRC_03	NA	NA	NA	NA	NA	NA	NA	NA	NA	NA	NA	NA	NA	NA	NA	NA	62.6	30.8	2.03247	4.8	15.9	22.7	3.6	NA
CRC_04	4.2	59.1	3.8	2.4	51.4	37.2	1.38172	11.2	10.4	6.7	0.9	1.8	1.6	63.6	25.2	2.7	74.6	22.1	3.37557	2	10.4	15.1	0.2	1.5
CRC_05	18	67.1	7.5	15.1	59	25.2	2.34127	5.7	4.9	6.5	0.1	13.1	1.7	82.7	4	4.2	36.8	55.4	0.66426	6.2	22.9	37.8	2.8	5.8
CRC_06	4.2	84.2	9.5	3.8	50.1	19.1	2.62304	30.4	18	6.9	2.7	2.8	0.4	91.1	1.4	1	67.7	20.6	3.28641	10.4	17	34.1	0.3	0.6
CRC_07	NA	NA	NA	NA	55.2	31.8	1.73585	12.6	7.2	8.4	1	NA	NA	NA	NA	NA	NA	NA		NA	NA	NA	NA	NA
CRC_08	15.4	76.1	6	16.3	39.5	40.8	0.968137	19.2	13.1	4.1	2.5	5.6	2.6	77.2	16.8	2	41.4	49.3	0.839757	4.9	24.2	16.9	2.1	0.7
CRC_09	12.6	33.3	5.1	60.5	55.9	33.4	1.67365	10.7	13.8	8.9	0.2	2.7	2.9	29.7	65.3	3.2	64.8	29.3	2.2116	5.8	9.1	15.9	0.8	0.4
CRC_10	20.9	70.5	3.8	22.3	33.7	25	1.348	41.4	4.4	7.9	0.2	9.8	NA	NA	NA	NA	NA	NA		NA	NA	NA	NA	NA
CRC_11	15.5	50.4	1.8	45.6	53.4	36.3	1.47107	10.1	7.4	8.6	0.4	3.6	0.9	83.9	5.3	6.6	35.9	26.1	1.37548	35.1	13.1	23.5	2.4	1.5
CRC_12	12.8	67.6	3.5	21.5	70.9	16.9	4.19527	12	4.7	9.4	0.2	4.7	2.1	92.4	0.8	2.8	22.9	72.4	0.316298	3.8	17.8	25.4	0.2	2.6
CRC_13	1.1	61.1	4.2	31.7	48	38	1.26316	13.7	7.4	8	0.1	0.5	0.6	85.5	4.5	4.7	42.1	54.5	0.772477	3.2	17.4	37.1	0.3	0.8
CRC_14	31.9	80	7.9	7.9	57.7	29.7	1.94276	12.2	3.6	7	0.1	7.2	0.1	75.5	1.6	1.6	36.6	34.8	1.05172	27.5	8.8	28.7	0.3	0.2
CRC_15	28.5	82.8	3.1	11.9	42.4	53.8	0.788104	3.8	3.8	5.2	0.1	12.5	1	93.6	0.4	1.6	20.5	78.2	0.262148	1.2	17.7	27.6	2.5	2
CRC_16	1.9	82.4	8.2	4.8	66.4	26.9	2.4684	6.3	6.6	9.6	3.3	0.6	2.2	86.1	9	1.5	60	28.4	2.11268	2.8	10.6	31.2	2.4	1
CRC_17	0.8	53.4	4.7	27.7	55.1	30	1.83667	14.7	9	15.5	2.7	0.8	0.7	81.9	3.1	2.4	22.3	71.4	0.312325	6.2	18	37.3	0.7	1.4
CRC_18	21.2	65.5	1.8	30.3	66.8	25.2	2.65079	8.2	7.9	5.1	2.6	13.1	0.9	94.4	1.1	1.9	42.2	47.3	0.892178	11	15	9.6	2.6	0.1
CRC_19	22.6	58.9	3.1	35.5	67.9	24.5	2.77143	7.5	12.7	4.9	3.4	5.3	0.4	71.8	17.7	7.6	66.5	23.7	2.80591	9.3	15.3	19.9	0.2	0.2
CRC_20	13.3	78.7	11.2	10	61.4	28.4	2.16197	6.9	2	4.8	0.1	2.3	2.7	96.8	0	1.1	28.9	69.2	0.41763	1.6	24.1	37.6	1.2	0.4
CRC_21	6.9	77.4	4.8	15.8	71.9	22	3.26818	5.9	6.1	4.3	0.3	2.5	2.2	80.1	1.8	9.1	46.3	46.5	0.995699	5.9	7.1	23.2	0.1	0.8
CRC_22	0.3	72.6	4.8	20.6	64.3	26.2	2.4542	7.4	19.2	5	1.2	0.1	1	85.6	2.5	4.3	63.1	33.2	1.9006	2.1	24.9	22.3	1.8	5.8
CRC_23	14.1	91	6.4	2.7	64.1	29.8	2.15101	5.6	3.1	5.9	0.1	3	0.1	79.8	3.1	7.7	62.5	32.6	1.91718	3.9	23.2	25.7	0.5	0.3
CRC_24	10.1	84.5	12.2	2.6	47.6	40.9	1.16381	11	11.6	6.4	0.4	2.4	NA	NA	NA	NA	NA	NA	NA	NA	NA	NA	NA	NA
CRC_25	29.3	68.3	9.2	20.2	53.3	34.8	1.53161	11.7	4	3.9	0.2	3.4	1.8	74.9	15.5	3.4	57.5	36	1.59722	5.5	12.1	18.4	0.4	5.2
CRC_26	15.4	90.3	6.8	1.5	43.1	50.5	0.853465	5.9	5	5.2	0.3	2.5	NA	NA	NA	NA	NA	NA	NA	NA	NA	NA	NA	NA
CRC_27	31.1	88.3	6.8	3.9	57.5	35.4	1.62429	6.8	12.2	6.9	1.2	4	NA	NA	NA	NA	NA	NA	NA	NA	NA	NA	NA	NA
CRC_28	19.5	89.6	5.2	4.1	57.2	36.6	1.56284	6.1	15.3	4.7	2.4	5.5	NA	NA	NA	NA	62.3	29	2.14828	8.7	38.6	20.4	17.1	NA
CRC_29	7.2	97.3	1.8	0.5	52.7	21.2	2.48585	26.4	9.5	4.1	10.2	2.3	4.8	87.8	3	2.8	48.1	47.8	1.00628	4.2	18.5	27.1	2.5	0.7
CRC_30	11.6	86.4	9.2	8.8	48.4	48.9	0.989775	2.2	11.6	6.7	1.3	6.2	0.5	87.4	4.5	6.4	56.6	40.9	1.38386	2.5	13.5	38	5.6	0.9
CRC_31	5	88	3.4	2.9	80.8	14.3	5.65035	4.5	19.6	2.6	7.7	NA	NA	NA	NA	NA	NA	NA	NA	NA	NA	NA	NA	NA
CRC_32	24.3	5.3	1.5	0.4	40.9	26.1	1.56705	33.3	20.5	6.7	3.7	NA	NA	NA	NA	NA	NA	NA	NA	NA	NA	NA	NA	NA
CRC_33	76.6	64.2	5	29.8	46.8	37	1.26486	14.9	8.6	6.6	0.8	NA	NA	NA	NA	NA	NA	NA	NA	NA	NA	NA	NA	NA
CRC_34	58.8	73.3	5	18.5	33.8	41.8	0.808612	23.7	16.2	6.5	2.8	NA	NA	NA	NA	NA	NA	NA	NA	NA	NA	NA	NA	NA
CRC_35	67.9	58.8	6	29.3	37.4	51	0.733333	8.7	13.8	9.6	7.2	NA	NA	NA	NA	NA	NA	NA	NA	NA	NA	NA	NA	NA
CRC_36	NA	NA	NA	NA	42.5	33.8	1.2574	22	10.4	6.7	4.5	NA	NA	NA	NA	NA	NA	NA	NA	NA	NA	NA	NA	NA
CRC_37	NA	NA	NA	NA	NA	NA	NA	NA	NA	NA	NA	NA	NA	NA	NA	NA	59.2	33.1	1.78852	7.4	32.9	13.9	16.5	NA
CRC_38	NA	NA	NA	NA	NA	NA	NA	NA	NA	NA	NA	NA	NA	NA	NA	NA	71.6	16.9	4.23669	10.1	9.8	12.7	5.2	NA
CON_01	NA	NA	NA	NA	50	44.7	1.11857	5	7.7	1.3	2.2	NA	NA	NA	NA	NA	NA	NA	NA	NA	NA	NA	NA	NA
CON_02	NA	77.9	7.8	10.8	58.6	28.7	2.04181	11.5	8	0.6	2.7	NA	NA	NA	NA	NA	NA	NA	NA	NA	NA	NA	NA	NA
CON_03	NA	79.6	7	11.3	46.2	43.4	1.06452	9.6	14.7	4.7	5.7	NA	NA	NA	NA	NA	NA	NA	NA	NA	NA	NA	NA	NA
CON_04	NA	NA	NA	NA	57.8	35.2	1.64205	6.1	9.6	6.1	2.7	NA	NA	NA	NA	NA	NA	NA	NA	NA	NA	NA	NA	NA
CON_05	NA	72.1	13.2	12.1	49.3	23.6	2.08898	25.2	8.3	5.6	3	NA	NA	NA	NA	NA	NA	NA	NA	NA	NA	NA	NA	NA
CON_06	NA	58.1	9.3	30.6	55.3	37.2	1.48656	6.7	11.3	3.7	5.6	NA	NA	NA	NA	NA	NA	NA	NA	NA	NA	NA	NA	NA
CON_07	NA	78.3	7.9	10.9	59.5	32.2	1.84783	7.5	9.2	3.3	7.1	NA	NA	NA	NA	NA	NA	NA	NA	NA	NA	NA	NA	NA
CON_08	NA	63.5	6.9	26.9	56.5	36.2	1.56077	6.5	9.2	6.8	7.5	NA	NA	NA	NA	NA	NA	NA	NA	NA	NA	NA	NA	NA

## Sheet: TableS2
Table S2. Data of cytokine induced P-STAT signature in peripheral blood and tumor site of colorectal cancer patients
	Peripheral blood												Tumor site
ID \ CIPS	IL-2_P-STAT5_Th	IL-6_P-STAT1_Th	IL-6_P-STAT3_Th	IL-10_P-STAT3_Th	IL-2_P-STAT5_Treg	IL-6_P-STAT1_Treg	IL-6_P-STAT3_Treg	IL-10_P-STAT3_Treg	IL-2_P-STAT5_Tc	IL-6_P-STAT1_Tc	IL-6_P-STAT3_Tc	IL-10_P-STAT3_Tc	IL-2_P-STAT5_Th	IL-6_P-STAT1_Th	IL-6_P-STAT3_Th	IL-10_P-STAT3_Th	IL-2_P-STAT5_Treg	IL-6_P-STAT1_Treg	IL-6_P-STAT3_Treg	IL-10_P-STAT3_Treg	IL-2_P-STAT5_Tc	IL-6_P-STAT1_Tc	IL-6_P-STAT3_Tc	IL-10_P-STAT3_Tc
CRC_CIPS_01	NA	2.79038	1.66906	0.953237	NA	2.23881	1.56627	1.21988	NA	2.51562	1.68443	0.946721	NA	1.00334	0.718919		NA	1.24519	0.646465		NA	0.967857	0.867596
CRC_CIPS_02	NA	1.96266	3.34783	1.92174	NA	2.03738	3.53403	2.34031	NA	0.88785	1.30058	2.2659	NA	2.04523	1.77273	1.39205	NA	2.20231	1.69663	1.47753	NA	1.28824	1.1338	1.47887
CRC_CIPS_03	NA	6.58952	3.45856	2.8011	NA	3.94492	3.56173	3.42593	NA	0.894737	0.924855	3.47399	NA	1.55738	1.98429	1.08901	NA	1.48291	2.05911	1.13793	NA	0.935345	1.25904	1.16867
CRC_CIPS_04	NA	16.8502	3.52695	3.2994	NA	7.18852	4.05172	4.37931	NA	1	1.11429	5.91429	NA	1.34101	1.15819	1.51412	NA	1.48768	1.47283	1.6087	NA	1.04268	0.96875	1.78125
CRC_CIPS_05	NA	9.67826	4.1	4.03125	NA	5.48387	4.78947	5.55263	NA	1.04023	1.25556	7.9	NA	1.00656	0.844156	1.61039	NA	1.10549	0.961538	2.04396	NA	1.05085	0.927152	2.15894
CRC_CIPS_06	NA	15.6825	3.5303	3.14015	NA	5.50855	3.28169	3.84507	NA	1.48276	1.22778	4.65556	NA	1.34818	0.91342	2.28139	NA	1.6696	1.43891	3	NA	1.23005	1.05594	4.3007
CRC_CIPS_07	NA	7.0902	4.06939	3.36735	NA	2.85015	4.11163	4.02791	NA	1.076	1.13873	5.20809	NA	1.02934	1.20259	2.01724	NA	1.15439	1.27413	2.3668	NA	1.02319	1.03093	2.43299
CRC_CIPS_08	NA	6.74771	4.66265	5.45783	NA	3.7907	4.42553	5.14184	NA	1.37255	1.48252	6.8951	NA	1.59701	1.46114	3.36788	NA	1.79646	1.70435	3.49565	NA	1.10897	1.27338	6.1223
CRC_CIPS_09	NA	14.4032	7.65546	8.34454	NA	7.98758	6.59184	7.46939	NA	1.29651	1.57143	9.86735	NA	0.935484	1.13171	2.41951	NA	0.839237	0.961905	2.21905	NA	1.06103	1.00637	3.49045
CRC_CIPS_10	NA	14.024	7.81443	9.04124	NA	7.67073	6.94118	7.90588	NA	1.33108	1.24444	9.85556	NA	0.9375	1.2963	2.58025	NA	0.995918	1.38298	2.75	NA	0.845304	1.23364	4.65421
CRC_CIPS_11	NA	1.58594	3.88016	3.81336	NA	1.68376	3.2378	3.59553	NA	1.14322	1.37598	4.40354	NA	1.1174	1.26434	1.45697	NA	1.0995	1.46415	0.550501	NA	1.41737	1.45953	3.4282
CRC_CIPS_12	NA	3	4.4	3.408	NA	1.83193	4.25581	4.33721	NA	1.07619	1.5875	5.8875	NA	1.04464	1.13542	2.01042	NA	1.08333	1.14444	2.13333	NA	1.41748	1.00935	2.06542
CRC_CIPS_13	NA	8.22541	2.85644	1.46166	NA	3.09811	3.93243	1.95405	NA	1.59629	1.2981	1.8645	NA	0.590395	1.18345	1.36691	NA	0.586739	1.4606	1.55166	NA	0.484979	0.975342	1.48767
CRC_CIPS_14	NA	8.15213	6.83188	2.55362	NA	4.68406	6.70992	3.83969	NA	0.968831	1.1434	3.81132	NA	1.13131	1.92398	2.01462	NA	1.45273	2.91092	3.0977	NA	0.797659	1.12074	2.22291
CRC_CIPS_15	NA	3.74771	5.26305	3.00418	NA	2.04107	4.57447	3.97872	NA	1.63696	1.14489	4.00284	NA	1.24074	1.00726	2	NA	1.16798	1.34197	2.55959	NA	1.11705	1.06826	2.84642
CRC_CIPS_16	NA	0.842795	1.21561	6.97026	NA	2.74648	8.70395	6.59211	NA	0.816254	1.15918	7.4	NA	1.85242	2.41204	1.89815	NA	2.4454	3.05297	2.60381	NA	1.07647	1.05042	2.66387
CRC_CIPS_17	NA	2.13026	4.10745	3.26863	NA	2.09349	4.42136	3.80777	NA	0.971879	1.2161	3.79661	NA	0.886417	1.12475	1.51509	NA	0.918283	1.36926	2.04192	NA	0.766414	0.915601	1.39898
CRC_CIPS_18	NA	5	8.99048	4.19048	NA	2.49048	11.6667	7.02667	NA	1.07568	1.49451	5.51648	NA	0.939086	1.46154	2.27885	NA	0.816514	1.49351	2.92208	NA	0.888158	1.25	2.77778
CRC_CIPS_19	NA	5.12925	5.04237	3.55085	NA	4.51969	6.07595	5.01266	NA	1.16102	1.27119	7.23729	NA	0.986928	1.25581	2.32558	NA	1.27711	2.12069	4.12069	NA	0.888	1.08108	2.18919
CRC_CIPS_20	NA	2.39572	6.0875	3.2375	NA	2.91919	7	4.08955	NA	1.23226	1.14286	4.6	NA	1.7341	3.31915	1.87234	NA	3.22124	4.95714	2.6	NA	1.08029	1.20588	1.86765
CRC_CIPS_21	NA	9.70874	4.11429	2.71429	NA	17.5584	8.53333	6.33333	NA	1.01667	1.25	7.20833	NA	1.38824	1.81481	2.2037	NA	8.27273	8.36364	7.86364	NA	1.10204	1.22222	3.74074
CRC_CIPS_22	NA	7.0678	1.52866	1.14013	NA	4.64286	1.02055	1.28767	NA	1.09836	0.313609	1.24852	NA	1.64567	2.32143	1.92857	NA	2.24242	3	3.21875	NA	0.703125	0.975904	1.90361
CRC_CIPS_23	NA	4.6087	3.72973	1.56757	NA	7.28571	4.46429	2.03571	NA	1.29268	1.08571	1.82857	NA	0.9375	1.05556	3.72222	NA	2	0.933333	7.33333	NA	1	1.11111	4.55556
CRC_CIPS_24	NA	13.2456	6.05882	3.97059	NA	9.5	9.10526	6.94737	NA	1.12	1.46875	3.96875	NA	1.53061	1.725	2.35	NA	1.67647	2.57692	3.96154	NA	1.21429	1.2	2.34286
CRC_CIPS_25	5.66667	NA	5.56757	4.2973	12.5588	NA	10.4118	9.58824	7.15909	NA	1.19231	6.65385	3.32812	NA	1.85714	1.68254	12.65	NA	4.61111	5.55556	4.69231	NA	1.12121	2.27273
CRC_CIPS_26	3.60377	5.4878	5.21429	3.75	6.29787	3.84211	10.5	10.8333	4.64444	1.33333	1.22222	5.07407	3.78723	1.3913	1.41667	2.52778	9.69231	1.71429	4.88889	10.5556	4.075	1.07317	1.06452	3
CRC_CIPS_27	3.08163	7.33846	3.35714	1.75	6.53125	6.10638	3.06667	2.26667	2.37838	1.25	1.01724	1.77586	3	1.05357	1.25862	1.39655	5.93333	1.04348	1.29545	1.68182	2.39583	0.924528	1.03922	1.45098
CRC_CIPS_28	3.97196	9.19512	5.56364	5.41818	5.92708	10.0152	5.48837	6.46512	3.78571	1.05128	1.14545	5.38182	2.8427	1.20253	1.2	2.8	5.21053	2.23214	2.55769	4.44231	3.03846	1.04348	1.05	2.98333
CRC_CIPS_29	NA	NA	6.04225	5.35211	NA	NA	5.69091	6.01818	NA	NA	1.42188	6.01562	4.42857	1.16514	1.15152	1.94949	6.08046	1.95575	1.78125	2.54167	4.70769	1.11628	1.13333	2.57333
CRC_CIPS_30	3.18	2.19355	4.39216	3.60784	5.43662	2.37778	4.82857	4.74286	2.58333	1.13793	1.4	3.56	2.52747	NA	NA	NA	4.52381	NA	NA	NA	2.30303	NA	NA	NA
CRC_CIPS_31	3.67073	NA	5.41667	NA	7.13846	NA	4.97826	NA	3.31944	NA	1.03509	NA	2.10448	NA	1.06061	NA	4.92683	NA	2.09615	NA	2.65909	NA	0.923077	NA
CRC_CIPS_32	3.35714	NA	5.56863	NA	6.03922	NA	7.2	NA	3.36765	NA	1.2549	NA	2.88679	NA	1.07843	NA	6.78571	NA	1.27586	NA	3.06818	NA	1.08889	NA
CRC_CIPS_33	3.27273	NA	4.57407	NA	5.0566	NA	5.72727	NA	3.18841	NA	1.16	NA	3.04	NA	1.06	NA	9.38889	NA	1.09756	NA	2.61905	NA	1.09091	NA
CRC_CIPS_34	3.25862	NA	3	NA	5.02564	NA	4.02703	NA	2.52542	NA	1.12245	NA	3.10448	NA	NA	NA	8.60606	NA	NA	NA	2.5873	NA	NA	NA
CRC_CIPS_35	3.72527	7.46269	6.40909	1.5	7.9625	2.04412	5.04545	1.93182	4.13187	1.08451	1.26087	1.65217	1.28358	NA	NA	NA	1.88636	NA	NA	NA	1.33898	NA	NA	NA
CRC_CIPS_36	2.96429	11.1268	5.81818	2.70455	5.95556	15.1481	5.93939	3.90909	4	1.11667	1.16667	2.83333	2.34722	NA	1.21311	1.04918	4.20968	NA	1.71111	NA	2.03509	NA	1.10638	1.14894
CRC_CIPS_37	5.63333	NA	5.39623	2.24528	7.47826	NA	6.59375	3.8125	4.55172	NA	1.09259	2.24074	3.57143	NA	1.21667	1.61667	7.72414	NA	1.68421	2.52632	3.02083	NA	1.12963	1.61111
CRC_CIPS_38	6.1875	NA	4.74359	4.15385	13.7826	NA	7.47619	7.14286	5.18605	NA	1.28205	4.38462	1.85417	NA	1.32	1.34	7.81818	NA	2.10526	2.31579	1.83721	NA	1.37778	1.48889
CRC_CIPS_39	5.08772	NA	3.65455	2.98182	7.18	NA	4.18182	4.02273	4.42553	NA	1.18367	3.26531	1.86441	NA	1.17333	1.26667	4.44737	NA	1.2	1.65	2.08163	NA	1.08824	1.38235
CRC_CIPS_40	3.96341	NA	3.72222	1.72222	6.8	NA	4.76	2.62	2.80282	NA	0.953125	1.53125	2.96552	0.990654	1.14516	1.30645	6.14286	1.41176	1.66667	1.49123	3.13725	1.01053	1.08197	1.2623
CON_CIPS_01	3.7	9.48438	4.93333	2.26667	6.66667	6.75	5.43333	3.8	2.42308	7.68852	3.84783	2.21739	NA	NA	NA	NA	NA	NA	NA	NA	NA	NA	NA	NA
CON_CIPS_02	3.13462	7.38806	4.54348	2.15217	8.86207	7.3913	5.15152	3.42424	2.98113	1.16923	1.3617	2.61702	NA	NA	NA	NA	NA	NA	NA	NA	NA	NA	NA	NA
CON_CIPS_03	4.76471	15.4	4.66667	2.38095	12.1	13.3636	6	4.14286	6.16667	1.71429	1.8	3.25	NA	NA	NA	NA	NA	NA	NA	NA	NA	NA	NA	NA
CON_CIPS_04	5.22	15.9737	2.71429	1.54286	12.0357	19.4231	3.54545	2.45455	5.55	15.5278	2.66667	1.83333	NA	NA	NA	NA	NA	NA	NA	NA	NA	NA	NA	NA
CON_CIPS_05	3.56627	15.0339	3.41096	1.68493	6.85135	12.9024	3.57143	2.46429	3.46429	2.92063	2.33333	1.74667	NA	NA	NA	NA	NA	NA	NA	NA	NA	NA	NA	NA
CON_CIPS_06	2.72826	13.3438	4.625	2.0625	5.5625	6.71739	4.45833	3.0625	2.86667	1.33846	1.47541	2.60656	NA	NA	NA	NA	NA	NA	NA	NA	NA	NA	NA	NA
CON_CIPS_07	2.77451	7.91111	4.12698	2.06349	5.7931	4.61446	4.26	2.92	2.45	1.62766	1.90909	2.21212	NA	NA	NA	NA	NA	NA	NA	NA	NA	NA	NA	NA
CON_CIPS_08	2.30682	9.55263	3.55172	2	4.63158	7.89655	4.06667	2.77778	1.92391	2.87805	2.17188	1.95312	NA	NA	NA	NA	NA	NA	NA	NA	NA	NA	NA	NA
CON_CIPS_09	8.91667	5.95098	5.35088	2.91228	23.7736	4.87912	10.25	8.5	8.66667	1.40196	1.33333	4.14035	NA	NA	NA	NA	NA	NA	NA	NA	NA	NA	NA	NA
CON_CIPS_10	9.875	3.46364	6.47059	2.48529	22.0417	3.97436	8.90698	5.30233	7.39286	0.92381	1.07246	3.30435	NA	NA	NA	NA	NA	NA	NA	NA	NA	NA	NA	NA
CON_CIPS_11	7.46914	3.15873	4.92857	2.75714	19.625	4.55102	6.24528	4.71698	4.9875	1.10345	1.27536	3.36232	NA	NA	NA	NA	NA	NA	NA	NA	NA	NA	NA	NA
CON_CIPS_12	3.41935	8.26923	3.05319	1.62766	4.9916	6.88506	2.84146	1.84146	2.92969	1.52941	1.38542	1.67708	NA	NA	NA	NA	NA	NA	NA	NA	NA	NA	NA	NA
CON_CIPS_13	2.76699	10.4834	3.13386	1.82677	4.20652	9.75	2.68376	2.13675	3.18557	1.32667	1.4186	2.03101	NA	NA	NA	NA	NA	NA	NA	NA	NA	NA	NA	NA
CON_CIPS_14	2.304	10.3077	4.08696	2.17391	4.64957	9.02727	3.72464	2.66667	2.78462	1.53271	1.59036	2.36145	NA	NA	NA	NA	NA	NA	NA	NA	NA	NA	NA	NA
CON_CIPS_15	3.91489	9.10769	4.91892	1.48649	10.8947	5.66071	5.17308	2.23077	3.28889	1.66667	1.73529	1.75	NA	NA	NA	NA	NA	NA	NA	NA	NA	NA	NA	NA
CON_CIPS_16	4.86486	15.3762	4.06154	1.49231	10.4479	8.40541	4.03774	2.39623	4.51327	2.3964	2.32394	1.53521	NA	NA	NA	NA	NA	NA	NA	NA	NA	NA	NA	NA

## Sheet: TableS3
Table S3. Data of cytokine induced P-STAT signature in peripheral blood cells, directly or indirectly cultured with HCT116.
	Th				Treg				Tc
ID \ CIPS	IL-2_P-STAT5_Th	IL-6_P-STAT1_Th	IL-6_P-STAT3_Th	IL-10_P-STAT3_Th	IL-2_P-STAT5_Treg	IL-6_P-STAT1_Treg	IL-6_P-STAT3_Treg	IL-10_P-STAT3_Treg	IL-2_P-STAT5_Tc	IL-6_P-STAT1_Tc	IL-6_P-STAT3_Tc	IL-10_P-STAT3_Tc
PBMC_01	NA	11.7164	5.97619	NA	NA	30.5094	6.6129	NA	NA	1.63235	1.7561	NA
PBMC_02	2.30743	2.93651	1.96285	1.02425	4.0072	2.28758	1.75398	1.48368	3.3201	0.36257	0.117357	1.24664
PBMC_03	3.86364	1.97059	1.61538	1.07692	3.24528	1.98387	5.7	2.1	6.03636	1.22222	1.0625	1.27083
PBMC_04	3.92424	1.88462	1.72222	0.866667	10.9206	9.0303	1.43478	0.898551	0.826903	1.14286	1.08955	1.13433
PBMC_05	5.5125	5.61983	3.07087	1.55118	13.4713	3.27922	3.01681	1.79832	6.93258	1.36641	1.44	1.65
PBMC_06	6.32394	7.68103	2.49412	1.31765	10.961	10.7404	3.28261	2.56522	6.63158	1.66316	1.98438	1.60938
PBMC_07	6.87629	2.03361	2.76289	1.41237	11.5422	3.28947	2.44048	1.78571	7.88	0.936364	1	1.70238
PBMC_08	3.68235	5.30769	3.79688	1.90625	6.26744	4.52747	2.8	2.27692	3.51163	1.48352	1.78125	1.92188
PBMC_09	8.0274	3.09783	2.34286	1.67143	7.67742	4.74713	3.22	2.1	4.58108	1.26667	1.41071	2.125
PBMC_10	7	1.82278	1.45192	1.36538	11	1.62595	1.34615	1.41026	6.48276	1.20635	1	1.76344
PBMC_11	8.11392	1.05	1.58462	1.38462	8.19091	0.971631	1.52326	1.62791	7.95402	0.946309	1.11364	1.70455
PBMC_12	4.54688	2.98795	1.46154	1.35664	4.82353	1.63014	1.52252	1.4955	4.85915	1.11864	1.05405	2.39189
PBMC_13	4.03636	5.48958	2.2907	1.56977	1.73714	6.84444	2.97917	2.5625	4.5	2.06452	1.98462	1.81538
PBMC_14	7.40909	7.54348	2.54667	1.68	6.35955	7.69863	2.9434	2.0566	5.39706	1.52778	1.44262	2
PBMC_HCT116_R1_Direct_01	3.49737	0.0919225	0.687213	1.15078	4.97919	0.123989	0.523562	1.78136	4.15245	0.17585	0.0588937	1.80735
PBMC_HCT116_R1_Direct_02	2.22917	1.4717	1.11864	1.15254	2.72222	1.14634	1.69231	1.76923	4.22222	1.2381	1	1.3913
PBMC_HCT116_R1_Direct_03	2.68932	1.17323	1.19697	0.954545	1.72754	0.958696	1.44828	1.27586	0.554947	0.978417	1.04651	1.4186
PBMC_HCT116_R1_Direct_04	2.39344	1.2	1.10959	1.11644	12	1.14876	1.16529	1.38017	5.71212	1	1.01316	1.56579
PBMC_HCT116_R1_Direct_05	2.70732	1.27536	1.17895	1.41053	10.8795	2.13725	1.27119	2.15254	5.53333	1	1	1.91935
PBMC_HCT116_R1_Direct_06	5.29487	1.26471	1.24299	1.28037	7.76923	1.71901	0.980583	1.14563	5.64	1.07229	1.04225	1.52113
PBMC_HCT116_R1_Direct_07	3.07143	1.58261	1.33636	1.21818	8.14062	1.64912	1.32632	1.35789	3.64	1.25316	1.10526	1.38158
PBMC_HCT116_R1_Direct_08	4.7625	1.30405	0.903448	0.875862	14.6027	1.31387	0.936842	1.02105	9.34177	1.21212	0.888889	1.20988
PBMC_HCT116_R10_Direct_01	2.80436	0.265054	0.680721	0.912537	4.94486	0.107641	0.514573	1.46877	4.05807	0.060121	0.025091	1.52466
PBMC_HCT116_R10_Direct_02	1.69767	1.11765	1.27692	1.01538	1.60638	1.14925	1.44828	1.24138	3.92	0.988095	1.08696	1.28261
PBMC_HCT116_R10_Direct_03	2.46753	1.68293	1.43299	1.09278	1.16173	2.25547	1.92857	1.34286	1.94148	1.18182	1.10169	1.52542
PBMC_HCT116_R10_Direct_04	2.52857	1.8963	1.5641	1.21795	8.55556	3.57931	1.62252	1.2649	5.05063	1.18605	1.28571	1.53571
PBMC_HCT116_R10_Direct_05	1.71429	1.70192	1.20652	1.3913	4.26667	1.45217	1.16176	1.67647	2.58929	1.39286	1.06349	1.57143
PBMC_HCT116_R10_Direct_06	4.16495	1.38	1.36496	1.16058	6.02041	3.75497	1.36752	1.2906	4.3587	1.1383	0.901235	1.5679
PBMC_HCT116_R10_Direct_07	2.4875	1.55085	1.16129	1.29839	5.19512	1.88991	1.27273	1.73737	2.5625	1.3	1.16049	1.53086
PBMC_HCT116_R10_Direct_08	3.80282	0.967742	1.21429	1.53061	7.94286	0.866873	1.24096	1.54217	3.64286	0.89726	1.08955	1.8806
PBMC_HCT116_R10_Direct_09	5.46479	1.07874	1.22124	1.14159	6.89394	0.958678	0.963855	1.31325	5.91139	1.00943	1.00935	1.16822
PBMC_HCT116_R10_Direct_10	3.2931	0.87013	0.988506	1.27586	6.72308	0.795181	1.21127	1.3662	7.27419	0.786408	0.963415	1.35366
PBMC_HCT116_R10_Direct_11	2.71053	0.946281	1.04762	1.11905	2.26984	0.952756	1.01538	1.24615	4.39062	0.979798	0.984615	1.21538
PBMC_HCT116_R10_Direct_12	4	0.864865	1.15385	1.12088	3.91579	1.00671	1.15068	1.26027	4.22034	1	1.02778	1.31944
PBMC_HCT116_R10_Indirect_01	7.26027	1.08654	1.29851	1.06716	8.5	0.932584	1.23656	1.04301	7.69136	1.10976	1.21429	1.16964
PBMC_HCT116_R10_Indirect_02	7.15789	1.13636	1.29915	1.28205	3.20134	1.36471	1.41772	1.59494	7.38333	1	1.13333	1.68
PBMC_HCT116_R10_Indirect_03	2.62791	1.04091	0.965517	1.13793	1.2636	1.05286	0.941176	1.23529	3.39394	1.04124	0.984615	1.35385
PBMC_HCT116_R10_Indirect_04	5.33824	1.00885	1.1625	1.3	2.67683	1.27419	1.26984	1.46032	5.22642	0.929825	1.04839	1.56452

## Sheet: TableS4
Table S4. Antibody panels for identification of lineages and phosphorylated STAT status
Subset	Lineage				Phosphorylated STAT
	Tube 1	Tube 2	Tube 3		Tube 1	Tube 2	Tube 3
Leukocytes	CD45	CD45	CD45		CD45	CD45	CD45
T cells	CD3	CD3	CD3		CD3	CD3	CD3
Helper T cells		CD4			CD4	CD4	CD4
Cytotoxic T cells		CD8
Regulatory T cells		CD25			CD25	CD25	CD25
Regulatory T cells		FOXP3
B cells	CD19
Natural killer cells	CD56		CD56
Myeloid cells	CD11b		Vα24-Jα11
Myeloid cells	CD11c
Phosphorylated STAT					pSTAT1	pSTAT3	pSTAT6
